# Supplementary material
Source: PubMed Central journal article supplement (PMC3677458)
Supplement: 1306976110_pnas.201306976SI.pdf [file 1306976110_pnas.201306976SI.pdf]

# Supporting Information

Mathew et al. 10.1073/pnas.1306976110

|                                   |                                   |                                               |                                                 |                                                     |
|-----------------------------------|-----------------------------------|-----------------------------------------------|-------------------------------------------------|-----------------------------------------------------|
| (-)-Carvyl acetate                | Furfuryl butyrate                 | 2,6-Dimethyl-5-heptenal                       | Ethyl vinyl ketone                              | 2-Acetylpyridine                                    |
| 1-Octen-3-yl acetate              | Furfuryl hexanoate                | 2-Ethylbutyraldehyde                          | trans-2-Nonenal                                 | 2-Pentylpyridine                                    |
| 2-Ethylbutyl acetate              | Furfuryl octanoate                | 2-Furaldehyde                                 | trans-3-Octen-2-one                             | 3-Acetylpyridine                                    |
| 2-Ethylhexyl acetate              | Furfuryl pentanoate               | 2-Isopropyl-5-methyl-2-hexenal                | $\beta$ -Ionone                                 | 3-Ethyl-2-methylpyridine                            |
| 2-Ethylhexyl salicylate           | Furfuryl propionate               | 2-Methyl-2-pentenal                           | ( $\pm$ )- $\gamma$ -Valerolactone              | Piperidine                                          |
| 2-Methoxyphenyl acetate           | Geranyl butyrate                  | 2-Methylbutyraldehyde                         | Menthallactone                                  | Pyrrolidine                                         |
| 2-Methylbutyl 2-methylbutyrate    | Geranyl tiglate                   | 2-Methylundecanal                             | $\alpha$ -Angelicalactone                       |                                                     |
| 2-Methylbutyl acetate             | Heptyl formate                    | 2-Phenyl-2-butenal                            | $\gamma$ -Dodecalactone                         |                                                     |
| 2-Methylbutyl isovalerate         | Hexyl 2-furoate                   | 2-Phenylpropionaldehyde                       | $\gamma$ -Heptalactone                          |                                                     |
| 2-Pentyl butyrate                 | Hexyl formate                     | 2-Phenylpropionaldehyde dimethyl-acetal       | $\gamma$ -Nonalactone                           |                                                     |
| 2-Phenoxyethyl isobutyrate        | Hexyl tiglate                     | 3-(5-Methyl-2-furyl)butanal                   | $\delta$ -Dodecalactone                         |                                                     |
| 3-Hexenyl 3-methylbutanoate       | Isomyl acetate                    | 3-(5,5-Trimethyl)hexanal                      | $\delta$ -Hexalactone                           |                                                     |
| 3-Methylbutyl 2-methylbutanoate   | Isomyl benzoate                   | 3-Ethoxypropionaldehydediethyl-acetal         | $\delta$ -Nonalactone                           |                                                     |
| 3-Octyl acetate                   | Isomyl butyrate                   | 3-furaldehyde                                 | $\delta$ -Tetradecalactone                      |                                                     |
| Allyl 2-ethylbutyrate             | Isomyl cinnamate                  | 4-Methyl-2-phenyl-2-pentenal                  | 5-Undecalactone                                 |                                                     |
| Allyl 2-furoate                   | Isomyl formate                    | 5-Methylfurfural                              | $\epsilon$ -Decalactone                         |                                                     |
| Allyl anthranilate                | Isomyl isobutyrate                | Acetal                                        | $\omega$ -6-Hexadecenalactone                   |                                                     |
| Allyl butyrate                    | Isomyl isovalerate                | Benzaldehyde dimethyl acetal                  |                                                 |                                                     |
| Allyl cinnamate                   | Isomyl propionate                 | Benzaldehyde propylene glycol acetal          | (S)-(-)-Perillyl alcohol                        | 2-(Methylthio)ethanol                               |
| Allyl cyclohexanepropionate       | Isomyl pyruvate                   | cis-3-Hexenal                                 | 1-Hexen-3-ol                                    | 2,3-,10-Mercaptopinane                              |
| Allyl hexanoate                   | Isomyl propionate                 | cis-4-Decenal                                 | 1-Pentanol                                      | 2,4,5-Trimethylthiazole                             |
| Allyl isovalerate                 | Isobutyl angelate                 | cis-6-Nonenal                                 | 1-Phenyl-1-propanol                             | 2,4-Dimethylthiazole                                |
| Allyl nonanoate                   | Isobutyl butyrate                 | cis-8-Undecenal                               | 1-Phenyl-3-methyl-3-pentanol                    | 2,5-Dimethylthiophene                               |
| Allyl octanoate                   | Isobutyl formate                  | Citral diethyl acetal                         | 2,6-Diisopropylphenol                           | 2,6-Dimethylthiophenol                              |
| Allyl phenoxyacetate              | Isobutyl isobutyrate              | Citral dimethyl acetal,                       | 2,6-Dimethyl-4-heptanol                         | 2-Acetylthiazole                                    |
| Allyl phenylacetate               | Isobutyl tiglate                  | heptanal                                      | 2-Ethyl-1-hexanol                               | 2-Ethoxythiazole                                    |
| Allyl propionate                  | Isobutyl trans-2-butenate         | Hydrocinnamaldehyde                           | 2-Ethylfenchol                                  | 2-Isopropyl-4-methylthiazole                        |
| Amyl 2-furoate                    | Isopropyl 2-methylbutyrate        | Isobutyraldehyde                              | 2-Hexanol                                       | 2-Mercapto-3-butanol                                |
| Amyl acetate                      | Isopropyl acetate                 | Isovaleraldehyde                              | 2-Methoxy-4-methylphenol                        | 2-Mercaptopropionic acid                            |
| Amyl butyrate                     | Isopropyl formate                 | Nonanal                                       | 2-Methoxy-4-propylphenol                        | 2-Methoxythiophenol                                 |
| Amyl formate                      | Isopropyl butyrate                | Propionaldehyde                               | 2-Methoxy-4-vinylphenol                         | 2-Methyl-2-thiazoline                               |
| Anisyl acetate                    | Isopropyl myristate               | p-Tolualdehyde                                | 2-Methyl-1-butanol                              | 2-Methyl-3-furanthiol                               |
| Benzyl acetoacetate               | Isopropyl phenylacetate           | Safranal                                      | 2-Methyl-3-buten-2-ol                           | 2-Methyl-3-methylthiofuran                          |
| Benzyl isovalerate                | Isopropyl acetate                 | trans, trans-2,4-Heptadienal                  | 2-Nonanol                                       | 3-(Methylthio)-1-hexanol                            |
| Benzyl salicylate                 | Lauryl acetate                    | trans, trans-2,4-Nonadienal                   | 2-Octanol                                       | 3-Acetyl-2,5-dimethylthiophene                      |
| Benzyl trans-2-methyl-2-butenate  | Linylal butyrate                  | trans, trans-2,6-Nonadienal                   | 3,5,5-Trimethyl-1-hexanol                       | 4,5-Dihydro-3(2H)-thiophenone                       |
| Bornyl valerate                   | Linylal formate                   | trans-2,cis-6-Nonadienal                      | 3,7-Dimethyl-1-octanol                          | 4,5-Dimethylthiazole                                |
| Butyl 2-methylbutyrate            | Linylal propionate                | trans-2-Decenal                               | 3-Hexanol                                       | 2-Isopropyl-4-methylthiazole                        |
| Butyl butyrate                    | Methyl (p-toloxyl)acetate         | trans-2-Dodecenal                             | 3-Methyl-1-pentanol                             | 4-Methyl-5-thiazolethanol acetate                   |
| Butyl formate                     | Methyl 2-furoate                  | trans-2-Heptenal                              | 3-Methyl-3-buten-1-ol                           | 4-Methyl-5-vinylthiazol acetate                     |
| Butyl hexanoate                   | Methyl 2-methylbutyrate           | trans-2-Hexen-1-ol                            | 3-Methyl-3-pentanol                             | 4-Methylthiazole                                    |
| Butyl isobutyrate                 | Methyl 2-methylpentanoate         | trans-2-Octenal                               | 3-Octanol                                       | 5-Methyl-2-thiophenecarboxaldehyde                  |
| Butyl isovalerate                 | Methyl 2-nonylate                 | trans-2-Pentenal                              | 3-Phenyl-1-propanol                             | Allyl disulfide                                     |
| Butyl laurate                     | Methyl 2-thiofuroate              | $\alpha$ -Amylcinnamaldehyde                  | 4-Allyl-2,6-dimethoxyphenol                     | Allyl sulfide                                       |
| Butyl levulinate                  | Methyl 3-phenylpropionate         | $\alpha$ -Amylcinnamaldehyde dimethyl-acetal  | 4-Ethylguaiaicol                                | Benzyl mercaptan                                    |
| Butyl L-lactate                   | Methyl 4-methylvalerate           | $\alpha$ -Hexylcinnamaldehyde                 | 4-Hexen-1-ol                                    | Dicyclohexyl disulfide                              |
| Butyl phenylacetate               | Methyl anthranilate               | $\alpha$ -Methylcinnamaldehyde                | 4-Isopropylbenzyl alcohol                       | Dimethyl disulfide                                  |
| Butyl propionate                  | Methyl cyclohexanecarboxylate     | $\alpha$ -Methylcinnamaldehyde                | 4-Methyl-2,6-dimethoxyphenol                    | Dimethyl trisulfide                                 |
| Butyl valerate                    | Methyl decanoate                  | $\beta$ -Cyclocitral                          | 5-Phenyl-1-pentanol                             | 2-Pentyl 2-mercaptopropionate                       |
| Cedryl acetate                    | Methyl dihydrojasmonate           |                                               | 6-Methyl-5-hepten-2-ol                          | Ethyl thioacetate                                   |
| cis-3-Hexenyl acetate             | Methyl formate                    | 1-(p-Methoxyphenyl)-2-propanone               | cis-2-Hexen-1-ol                                | Ethyl(methylthio)acetate                            |
| cis-3-Hexenyl benzoate            | Methyl isobutyrate                | 1-Octen-3-one                                 | cis-2-Nonen-1-ol                                | Furfuryl isopropyl sulfide                          |
| cis-3-Hexenyl butyrate            | Methyl isovalerate                | 2,2,6-Trimethylcyclohexanone                  | cis-2-Penten-1-ol                               | Furfuryl methyl sulfide                             |
| cis-3-Hexenyl cis-3-hexenoate     | Methyl jasmonate                  | 2,3-butanedione                               | cis-3-Hepten-1-ol                               | Isopropyl disulfide                                 |
| cis-3-Hexenyl crotonate           | Methyl propionate                 | 2,3-Heptanedione                              | cis-3-Hexen-1-ol                                | Methyl (methylthio)acetate                          |
| cis-3-Hexenyl formate             | Methyl p-tert-butylphenylacetate  | 2,3-Hexanedione                               | cis-3-Octen-1-ol                                | Methyl 3-(methylthio)propionate                     |
| cis-3-Hexenyl hexanoate           | Methyl sorbate                    | 2,3-Pentanedione                              | cis-5-Octen-1-ol                                | Methyl furfuryl disulfide                           |
| cis-3-Hexenyl isobutyrate         | Methyl stearate                   | 2,5-Dimethyl-4-hydroxy-3(2H)-furanone         | cis-6-Nonen-1-ol                                | Methyl phenyl sulfide                               |
| cis-3-Hexenyl lactate             | Methyl tiglate                    | 2,6-Dimethyl-4-heptanone                      | Decahydro-2-naphthol                            | Methyl propyl disulfide                             |
| cis-3-Hexenyl propionate          | Methyl trans-2-octenoate          | 2',4'-Dimethylacetophenone                    | Dihydromyrcenol                                 | Methyl sulfoxide                                    |
| cis-3-Hexenyl tiglate             | Methyl trans-3-hexenoate          | 2'-Aminoacetophenone                          | DL-3-Methyl-2-butanol                           | p-Mentha-8-thiol-3-one                              |
| Citronellyl tiglate               | Methyl valerate                   | 2-Methylcyclohexanone                         | D-Neomenthol                                    | Propyl mercaptan                                    |
| Cyclohexyl acetate                | Myrtenyl acetate                  | 2-Methyltetrahydro-3-furanone                 | Heptyl alcohol                                  |                                                     |
| Cyclohexyl propionate             | n-Decyl acetate                   | 2-Methyltetrahydrothiophen-3-one              | Isobutyl alcohol                                | ( $\pm$ )-Theaspirane                               |
| Decyl butyrate                    | Neryl acetate                     | 2-Nonanone                                    | Isopropyl alcohol                               | 1,1-Dimethoxyethane                                 |
| Decyl propionate                  | Octyl formate                     | 2-Octanone                                    | Nerol                                           | 1,2,3,4-Tetrahydroquinoline                         |
| Diethyl malate                    | <i>o</i> -Tolyl isobutyrate       | 2-sec-Butylcyclohexanone                      | Nerolidol                                       | 1,2,6-Trihydroxyhexane                              |
| Dimethyl malonate                 | Piperonyl isobutyrate             | 3,4-Hexanedione                               | p, <i>o</i> , <i>o</i> -Trimethylbenzyl alcohol | 1,4-Cineole                                         |
| Dimethyl succinate                | Propyl formate                    | 3-Decanone                                    | Rhodinol                                        | 1-Methyl-1,4-cyclohexadiene                         |
| Ethyl ( $\pm$ )-2-hydroxycaproate | trans-2,cis-6-Nonadienyl acetate  | 3-Decanol                                     | Tetrahydrofurfuryl alcohol                      | 2,4-Dimethylanisole                                 |
| Ethyl 2-methyl-4-pentenoate       | $\alpha$ -Methylbenzyl acetate    | 3-Decen-2-one                                 | Tetrahydromyrcenol                              | 2-Isobutyl-2-methyl-1,3-dioxolane                   |
| Ethyl 2-methylbutyrate            | $\alpha$ -Methylbenzyl butyrate   | 3-Heptanone                                   | trans-2,cis-6-Nonadien-1-ol                     | 2-Methylanisole                                     |
| Ethyl 2-methylpentanoate          | $\alpha$ -Methylbenzyl propionate | 3-Hexanone                                    | trans-2-Octen-1-ol                              | 2-Propyl-4-methyl-1,3-dioxolane                     |
| Ethyl 2-nonylate                  | ( $\pm$ )-4-Methylcrotonic acid   | 3-Methyl-2-cyclohexenone                      | trans-3-Hexen-1-ol                              | 2,2'-(Dithiodimethylene)difuran                     |
| Ethyl 2-trans-4-cis-decadienoate  | 2-Ethylbutyric acid               | 3-Methylcyclohexanone                         | $\alpha$ -Amylcinnamyl alcohol                  | 2,3-Dimethylbenzofuran                              |
| Ethyl 3-hydroxyhexanoate          | 2-Methyl-4-pentenoic acid         | 3-Nonanone                                    | 2,3,5-Trimethylpyrazine                         | 2-Acetyl-5-methylfuran                              |
| Ethyl 3-oxohexanoate              | 2-Methylbutyric acid              | 3-Octanone                                    | 2,3-Diethylpyrazine                             | 2-Ethylfuran                                        |
| Ethyl 3-phenylglycidate           | 2-Methylheptanoic acid            | 3-Pentanone                                   | 2,3-Dimethylpyrazine                            | 2-Methylfuran                                       |
| Ethyl acetoacetate                | 2-Methylpentanoic acid            | 3-Penten-2-one                                | 2,5-Dimethylpyrazine                            | 2-Pentylfuran                                       |
| Ethyl anthranilate                | 2-Oxobutylic acid                 | 4-(4-Methoxyphenyl)-2-butanone                | 2-Acetyl-3,5(6)-dimethylpyrazine                | 3-Acetyl-2,5-dimethylfuran                          |
| Ethyl chrysanthemate              | Methyl trans-3-hexenoate          | 4-(p-Acetoxyphenyl)-2-butanone                | 2-Acetyl-3-ethylpyrazine                        | 3,7-Dimethyl-2,6-cycladienenitrile                  |
| Ethyl cyclohexanepropionate       | Methyl valerate                   | 4,5-Dimethyl-3-hydroxy-2,5-dihydrofuran-2-one | 2-Acetyl-3-methylpyrazine                       | 3-Butylideneephthalide                              |
| Ethyl formate                     | 2-Methyl-2-pentenoic acid         | 4-Heptanone                                   | 2-Ethyl-3,5(or 6)-dimethylpyrazine              | 3-Propylideneephthalide                             |
| Ethyl heptanoate                  | 4-Ethylpentanoic acid             | 4-Hexen-3-one                                 | 2-Ethyl-3-methoxy-pyrazine                      | 4-Methylanisole                                     |
| Ethyl isobutyrate                 | 4-Pentenoic acid                  | 4-Methyl-2-pentanone                          | 2-Ethyl-3-methylpyrazine                        | 4,5,6,7-Tetrahydro-3,6-dimethylbenzofuran           |
| Ethyl isovalerate                 | Formic acid                       | 4-Methyl-3-penten-2-one                       | 2-Ethyl-5(6)-methylpyrazine                     | 5,6,7,8-Tetrahydroquinoxaline                       |
| Ethyl levulinate                  | Isovaleric acid                   | 4-Methylcyclohexanone                         | 2-Ethylpyrazine                                 | 5-Methylquinoxaline                                 |
| Ethyl nonanoate                   | Pyroglutamic acid                 | 4-Methylthio-2-butanone                       | 2-Isobutyl-3-methylpyrazine                     | Anisole                                             |
| Ethyl pyruvate                    | Valeric acid                      | 4-Methylthio-4-methyl-2-pentanone             | 2-Methoxy-pyrazine                              | Dipentene                                           |
| Ethyl sorbate                     | (S)-(-)-Penillaldehyde            | 5-Hydroxy-4-octanone                          | 2-Methylpyrazine                                | Isopentylamine                                      |
| Ethyl tiglate                     | 10-Undecenal                      | 5-Methyl-2-hepten-4-one                       | 5H-5-Methyl-6,7-dihydrocyclopenta[b]pyrazine    | m-dimethoxybenzene                                  |
| Ethyl trans-2-butenate            | 2,4-Dimethylbenzaldehyde          | Allyl-cis-one                                 |                                                 | p-Propyl anisole                                    |
| Ethyl trans-2-octenoate           | 2,4-Dimethylbutyraldehyde         | cyclohexenecarboxaldehyde                     |                                                 | Tetrahydro-4-methyl-2-(2-methyl-1-propenyl)2H-pyran |
| Ethyl trans-3-hexenoate           | Ethyl valerate                    | 2,4-Hexadienal                                |                                                 | trans-2,3-Epoxybutane                               |
| Ethyl trans-4-octenoate           | Ethylene brassylate               | 2,4-Octadienal                                |                                                 |                                                     |
| Ethyl undecanoate                 | Furfuryl 3-methylbutanoate        | 2,6,6-Trimethyl-1-cyclohexene-1-acetaldehyde  |                                                 |                                                     |
| Furfuryl acetate                  | Furfuryl acetate                  |                                               |                                                 |                                                     |

**Fig. S1.** Odor panel. The 479 odorants used in the initial screen, color coded by functional group (dark green, esters; pink, acids; gray, aldehydes; yellow, ketones; dark blue, lactones; red, alcohols; purple, pyrazines; light blue, pyrroles, pyridines, and piperidines; light green, terpenes; black, sulfur compounds; brown, other compounds). We note that some odorants, e.g., ethyl thioacetate, can be classified in more than one class but are listed in only one. Some groups contain both aliphatic and aromatic compounds.

## Dataset S1. Responses of receptors to the most effective odorants tested at $10^{-4}$ dilution

### [Dataset S1](#)

Values are mean spike rates  $\pm$ SEM (in spikes per second). Spontaneous activity and response to paraffin oil solvent alone have been subtracted from the mean spike rates and are indicated below. Spontaneous firing rates were subtracted from the values shown for the paraffin oil diluent ( $6 \leq n \leq 10$ ).
